# Supplementary material for: Local Adaptation at the Transcriptome Level in Brown Trout: Evidence from Early Life History Temperature Genomic Reaction Norms
Source: PubMed Central journal article supplement (PMC3891768; doi:10.1371/journal.pone.0085171), 2014-01-14
Supplement: pone.0085171.s002.pdf [file pone.0085171.s002.pdf]

Table S1. GO-terms identified with enrichment analysis comparing cDNA clones with a population effect against the reference set (8588 analysed cDNA clones) with BLAST2GO [1,2]. The following information is given: GO-ID, term, p-value after correcting for the False Discovery rate (FDR) [3], number of cDNA clones representing that GO-term with a population effect (Test), and among the 8588 cDNA clones (Reference).

| GO-ID      | Term                                                   | FDR corrected p-value | Test | Reference |
|------------|--------------------------------------------------------|-----------------------|------|-----------|
| GO:0015671 | oxygen transport                                       | 4E-17                 | 21   | 37        |
| GO:0015669 | gas transport                                          | 4E-17                 | 21   | 37        |
| GO:0019882 | antigen processing and presentation                    | 1E-09                 | 15   | 42        |
| GO:0006955 | immune response                                        | 2E-07                 | 15   | 66        |
| GO:0006810 | transport                                              | 4E-06                 | 46   | 784       |
| GO:0051234 | establishment of localization                          | 4E-06                 | 46   | 786       |
| GO:0002376 | immune system process                                  | 5E-06                 | 15   | 88        |
| GO:0051179 | localization                                           | 2E-05                 | 46   | 826       |
|            | antigen processing and presentation of peptide antigen |                       |      |           |
| GO:0002474 | via MHC class I                                        | 2E-03                 | 6    | 16        |
| GO:0048002 | antigen processing and presentation of peptide antigen | 2E-03                 | 6    | 16        |
| GO:0016998 | cell wall macromolecule catabolic process              | 4E-03                 | 5    | 11        |

## References

1. Conesa A, Gotz S, Garcia-Gomez JM, Terol J, Talon M, et al. (2005) Blast2GO: a universal tool for annotation, visualization and analysis in functional genomics research. *Bioinformatics* 21: 3674-3676.
2. Gotz S, Garcia-Gomez JM, Terol J, Williams TD, Nagaraj SH, et al. (2008) High-throughput functional annotation and data mining with the Blast2GO suite. *Nucleic Acids Research* 36: 3420-3435.
3. Benjamini Y, Yekutieli D (2001) The control of the false discovery rate in multiple testing under dependency. *Annals of Statistics* 29: 1165-1188.
