# Supplementary material for: Local Adaptation at the Transcriptome Level in Brown Trout: Evidence from Early Life History Temperature Genomic Reaction Norms
Source: PubMed Central journal article supplement (PMC3891768; doi:10.1371/journal.pone.0085171), 2014-01-14
Supplement: pone.0085171.s003.pdf [file pone.0085171.s003.pdf]

Table S2. GO-terms identified with enrichment analysis comparing cDNA clones with a temperature effect against the reference set (8588 analysed cDNA clones) with BLAST2GO [1,2]. The following information is given: GO-ID, term, p-value after correcting for the False Discovery rate (FDR) [3], number of cDNA clones representing that GO-term with a temperature effect (Test), and among the 8588 cDNA clones (Reference).

| GO-ID      | Term                                                     | FDR corrected p-value | Test | Reference |
|------------|----------------------------------------------------------|-----------------------|------|-----------|
| GO:0006123 | mitochondrial electron transport, cytochrome c to oxygen | 7E-12                 | 77   | 40        |
| GO:0022904 | respiratory electron transport chain                     | 4E-11                 | 99   | 69        |
| GO:0042773 | ATP synthesis coupled electron transport                 | 1E-10                 | 96   | 68        |
| GO:0042775 | mitochondrial ATP synthesis coupled electron transport   | 1E-10                 | 96   | 68        |
| GO:0022900 | electron transport chain                                 | 1E-09                 | 105  | 84        |
| GO:0045333 | cellular respiration                                     | 3E-06                 | 105  | 106       |
| GO:0015671 | oxygen transport                                         | 4E-06                 | 39   | 19        |
| GO:0015669 | gas transport                                            | 4E-06                 | 39   | 19        |
| GO:0044260 | cellular macromolecule metabolic process                 | 7E-06                 | 387  | 1108      |
| GO:0055114 | oxidation reduction                                      | 1E-05                 | 178  | 232       |
| GO:0015980 | energy derivation by oxidation of organic compounds      | 2E-05                 | 105  | 113       |
| GO:0044267 | cellular protein metabolic process                       | 3E-05                 | 262  | 792       |
| GO:0006118 | electron transport                                       | 1E-04                 | 70   | 67        |
| GO:0022613 | ribonucleoprotein complex biogenesis                     | 2E-04                 | 125  | 426       |
| GO:0042254 | ribosome biogenesis                                      | 3E-04                 | 122  | 416       |
| GO:0006091 | generation of precursor metabolites and energy           | 4E-04                 | 173  | 243       |
| GO:0007586 | digestion                                                | 4E-04                 | 14   | 2         |
| GO:0010467 | gene expression                                          | 5E-04                 | 250  | 734       |
| GO:0006412 | translation                                              | 5E-04                 | 163  | 516       |
| GO:0015992 | proton transport                                         | 5E-04                 | 119  | 151       |
| GO:0006818 | hydrogen transport                                       | 5E-04                 | 119  | 151       |
| GO:0006812 | cation transport                                         | 5E-04                 | 157  | 218       |
| GO:0006119 | oxidative phosphorylation                                | 6E-04                 | 117  | 148       |
| GO:0015672 | monovalent inorganic cation transport                    | 6E-04                 | 124  | 161       |

|            |                                                            |       |     |      |
|------------|------------------------------------------------------------|-------|-----|------|
| GO:0051179 | localization                                               | 7E-04 | 329 | 543  |
|            | antigen processing and presentation of peptide antigen via |       |     |      |
| GO:0002474 | MHC class I                                                | 7E-04 | 17  | 5    |
| GO:0048002 | antigen processing and presentation of peptide antigen     | 7E-04 | 17  | 5    |
| GO:0009059 | macromolecule biosynthetic process                         | 9E-04 | 247 | 718  |
| GO:0016310 | phosphorylation                                            | 2E-03 | 135 | 185  |
| GO:0006811 | ion transport                                              | 2E-03 | 162 | 234  |
| GO:0006810 | transport                                                  | 2E-03 | 312 | 518  |
| GO:0051234 | establishment of localization                              | 2E-03 | 312 | 520  |
| GO:0006879 | cellular iron ion homeostasis                              | 2E-03 | 30  | 20   |
| GO:0055072 | iron ion homeostasis                                       | 2E-03 | 30  | 20   |
| GO:0034645 | cellular macromolecule biosynthetic process                | 3E-03 | 240 | 688  |
| GO:0006826 | iron ion transport                                         | 3E-03 | 27  | 18   |
| GO:0006793 | phosphorus metabolic process                               | 3E-03 | 144 | 207  |
| GO:0006796 | phosphate metabolic process                                | 3E-03 | 144 | 207  |
| GO:0051258 | protein polymerization                                     | 5E-03 | 41  | 37   |
| GO:0044085 | cellular component biogenesis                              | 6E-03 | 192 | 561  |
| GO:0043170 | macromolecule metabolic process                            | 9E-03 | 491 | 1259 |
| GO:0007018 | microtubule-based movement                                 | 1E-02 | 28  | 21   |

---

## References

1. Conesa A, Gotz S, Garcia-Gomez JM, Terol J, Talon M, et al. (2005) Blast2GO: a universal tool for annotation, visualization and analysis in functional genomics research. *Bioinformatics* 21: 3674-3676.
2. Gotz S, Garcia-Gomez JM, Terol J, Williams TD, Nagaraj SH, et al. (2008) High-throughput functional annotation and data mining with the Blast2GO suite. *Nucleic Acids Research* 36: 3420-3435.
3. Benjamini Y, Yekutieli D (2001) The control of the false discovery rate in multiple testing under dependency. *Annals of Statistics* 29: 1165-1188.
