# Supplementary material for: Local Adaptation at the Transcriptome Level in Brown Trout: Evidence from Early Life History Temperature Genomic Reaction Norms
Source: PubMed Central journal article supplement (PMC3891768; doi:10.1371/journal.pone.0085171), 2014-01-14
Supplement: pone.0085171.s004.pdf [file pone.0085171.s004.pdf]

Table S3. GO-terms identified with enrichment analysis comparing cDNA clones with an interaction effect against the reference set (8588 analysed cDNA clones) with BLAST2GO [1,2]. The following information is given: GO-ID, term, p-value after correcting for the False Discovery rate (FDR) [3], number of cDNA clones representing that GO-term with a interaction (Test), and among the 8588 cDNA clones (Reference).

| GO-ID      | Term                                       | FDR corrected p-value | Test | Reference |
|------------|--------------------------------------------|-----------------------|------|-----------|
| GO:0044282 | small molecule catabolic process           | 7E-09                 | 32   | 114       |
| GO:0016052 | carbohydrate catabolic process             | 7E-09                 | 30   | 100       |
| GO:0005975 | carbohydrate metabolic process             | 7E-09                 | 38   | 164       |
| GO:0016051 | carbohydrate biosynthetic process          | 1E-08                 | 27   | 82        |
| GO:0006096 | glycolysis                                 | 4E-08                 | 25   | 76        |
| GO:0006094 | gluconeogenesis                            | 8E-08                 | 23   | 66        |
| GO:0009612 | response to mechanical stimulus            | 8E-08                 | 9    | 2         |
| GO:0046364 | monosaccharide biosynthetic process        | 8E-08                 | 23   | 68        |
| GO:0019319 | hexose biosynthetic process                | 8E-08                 | 23   | 68        |
| GO:0046365 | monosaccharide catabolic process           | 8E-08                 | 25   | 82        |
| GO:0019320 | hexose catabolic process                   | 8E-08                 | 25   | 82        |
| GO:0006007 | glucose catabolic process                  | 8E-08                 | 25   | 82        |
| GO:0046164 | alcohol catabolic process                  | 1E-07                 | 25   | 84        |
| GO:0044275 | cellular carbohydrate catabolic process    | 1E-07                 | 25   | 84        |
| GO:0019882 | antigen processing and presentation        | 1E-07                 | 18   | 39        |
| GO:0006090 | pyruvate metabolic process                 | 1E-07                 | 24   | 78        |
| GO:0046165 | alcohol biosynthetic process               | 2E-07                 | 23   | 73        |
| GO:0006006 | glucose metabolic process                  | 3E-07                 | 26   | 97        |
| GO:0034637 | cellular carbohydrate biosynthetic process | 3E-07                 | 23   | 75        |
| GO:0019318 | hexose metabolic process                   | 5E-07                 | 26   | 102       |
| GO:0005996 | monosaccharide metabolic process           | 8E-07                 | 26   | 105       |
| GO:0090257 | regulation of muscle system process        | 4E-06                 | 9    | 7         |
| GO:0006937 | regulation of muscle contraction           | 4E-06                 | 9    | 7         |
| GO:0007160 | cell-matrix adhesion                       | 4E-06                 | 10   | 11        |

|            |                                                                      |       |    |     |
|------------|----------------------------------------------------------------------|-------|----|-----|
| GO:0031589 | cell-substrate adhesion                                              | 4E-06 | 10 | 11  |
| GO:0045988 | negative regulation of striated muscle contraction                   | 4E-06 | 7  | 2   |
| GO:0045932 | negative regulation of muscle contraction                            | 4E-06 | 7  | 2   |
|            | positive regulation of fast-twitch skeletal muscle fiber contraction |       |    |     |
| GO:0031448 | contraction                                                          | 4E-06 | 7  | 2   |
| GO:0003009 | skeletal muscle contraction                                          | 4E-06 | 7  | 2   |
| GO:0003010 | voluntary skeletal muscle contraction                                | 4E-06 | 7  | 2   |
| GO:0014721 | twitch skeletal muscle contraction                                   | 4E-06 | 7  | 2   |
| GO:0014819 | regulation of skeletal muscle contraction                            | 4E-06 | 7  | 2   |
| GO:0045933 | positive regulation of muscle contraction                            | 4E-06 | 7  | 2   |
| GO:0014724 | regulation of twitch skeletal muscle contraction                     | 4E-06 | 7  | 2   |
| GO:0045989 | positive regulation of striated muscle contraction                   | 4E-06 | 7  | 2   |
| GO:0031446 | regulation of fast-twitch skeletal muscle fiber contraction          | 4E-06 | 7  | 2   |
| GO:0031443 | fast-twitch skeletal muscle fiber contraction                        | 4E-06 | 7  | 2   |
| GO:0050879 | multicellular organismal movement                                    | 9E-06 | 7  | 3   |
| GO:0050881 | musculoskeletal movement                                             | 9E-06 | 7  | 3   |
| GO:0006942 | regulation of striated muscle contraction                            | 9E-06 | 7  | 3   |
| GO:0006200 | ATP catabolic process                                                | 9E-06 | 7  | 3   |
| GO:0009261 | ribonucleotide catabolic process                                     | 9E-06 | 7  | 3   |
| GO:0009143 | nucleoside triphosphate catabolic process                            | 9E-06 | 7  | 3   |
| GO:0006195 | purine nucleotide catabolic process                                  | 9E-06 | 7  | 3   |
| GO:0009203 | ribonucleoside triphosphate catabolic process                        | 9E-06 | 7  | 3   |
| GO:0009154 | purine ribonucleotide catabolic process                              | 9E-06 | 7  | 3   |
| GO:0009146 | purine nucleoside triphosphate catabolic process                     | 9E-06 | 7  | 3   |
| GO:0009207 | purine ribonucleoside triphosphate catabolic process                 | 9E-06 | 7  | 3   |
| GO:0006066 | alcohol metabolic process                                            | 1E-05 | 26 | 129 |
| GO:0006955 | immune response                                                      | 1E-05 | 18 | 63  |
| GO:0032787 | monocarboxylic acid metabolic process                                | 1E-05 | 24 | 112 |
| GO:0044262 | cellular carbohydrate metabolic process                              | 1E-05 | 26 | 130 |
| GO:0071554 | cell wall organization or biogenesis                                 | 2E-05 | 10 | 15  |

|            |                                                         |       |    |      |
|------------|---------------------------------------------------------|-------|----|------|
| GO:0044036 | cell wall macromolecule metabolic process               | 2E-05 | 10 | 15   |
| GO:0030001 | metal ion transport                                     | 3E-05 | 23 | 108  |
| GO:0034656 | nucleobase, nucleoside and nucleotide catabolic process | 4E-05 | 7  | 5    |
|            | nucleobase, nucleoside, nucleotide and nucleic acid     |       |    |      |
| GO:0034655 | catabolic process                                       | 4E-05 | 7  | 5    |
| GO:0009166 | nucleotide catabolic process                            | 4E-05 | 7  | 5    |
| GO:0015674 | di-, tri-valent inorganic cation transport              | 5E-05 | 16 | 55   |
| GO:0046700 | heterocycle catabolic process                           | 9E-05 | 7  | 6    |
| GO:0055066 | di-, tri-valent inorganic cation homeostasis            | 1E-04 | 16 | 59   |
| GO:0030005 | cellular di-, tri-valent inorganic cation homeostasis   | 1E-04 | 16 | 59   |
| GO:0055074 | calcium ion homeostasis                                 | 1E-04 | 9  | 15   |
| GO:0055065 | metal ion homeostasis                                   | 1E-04 | 9  | 15   |
| GO:0006875 | cellular metal ion homeostasis                          | 1E-04 | 9  | 15   |
| GO:0006874 | cellular calcium ion homeostasis                        | 1E-04 | 9  | 15   |
| GO:0009056 | catabolic process                                       | 1E-04 | 43 | 332  |
| GO:0043170 | macromolecule metabolic process                         | 2E-04 | 62 | 1688 |
| GO:0044270 | cellular nitrogen compound catabolic process            | 2E-04 | 7  | 7    |
| GO:0055080 | cation homeostasis                                      | 2E-04 | 16 | 64   |
| GO:0030003 | cellular cation homeostasis                             | 2E-04 | 16 | 64   |
| GO:0070838 | divalent metal ion transport                            | 2E-04 | 9  | 17   |
| GO:0006816 | calcium ion transport                                   | 2E-04 | 9  | 17   |
| GO:0044283 | small molecule biosynthetic process                     | 3E-04 | 37 | 275  |
| GO:0042180 | cellular ketone metabolic process                       | 4E-04 | 37 | 279  |
| GO:0002376 | immune system process                                   | 4E-04 | 18 | 85   |
| GO:0006873 | cellular ion homeostasis                                | 4E-04 | 16 | 68   |
| GO:0051241 | negative regulation of multicellular organismal process | 4E-04 | 7  | 9    |
| GO:0006941 | striated muscle contraction                             | 4E-04 | 7  | 9    |
| GO:0006936 | muscle contraction                                      | 4E-04 | 10 | 25   |
| GO:0003012 | muscle system process                                   | 4E-04 | 10 | 25   |
| GO:0055082 | cellular chemical homeostasis                           | 4E-04 | 16 | 69   |

|            |                                                         |       |    |     |
|------------|---------------------------------------------------------|-------|----|-----|
| GO:0050801 | ion homeostasis                                         | 4E-04 | 16 | 69  |
| GO:0051240 | positive regulation of multicellular organismal process | 6E-04 | 7  | 10  |
| GO:0048878 | chemical homeostasis                                    | 7E-04 | 16 | 72  |
| GO:0043436 | oxoacid metabolic process                               | 7E-04 | 33 | 245 |
| GO:0006082 | organic acid metabolic process                          | 7E-04 | 33 | 245 |
| GO:0019752 | carboxylic acid metabolic process                       | 7E-04 | 33 | 245 |
| GO:0009628 | response to abiotic stimulus                            | 7E-04 | 10 | 27  |
| GO:0008652 | cellular amino acid biosynthetic process                | 3E-03 | 10 | 34  |
| GO:0044057 | regulation of system process                            | 4E-03 | 9  | 28  |
| GO:0016998 | cell wall macromolecule catabolic process               | 4E-03 | 6  | 10  |
| GO:0006022 | aminoglycan metabolic process                           | 5E-03 | 8  | 22  |
| GO:0006542 | glutamine biosynthetic process                          | 8E-03 | 4  | 3   |
| GO:0009309 | amine biosynthetic process                              | 9E-03 | 10 | 40  |

---

## References

1. Conesa A, Gotz S, Garcia-Gomez JM, Terol J, Talon M, et al. (2005) Blast2GO: a universal tool for annotation, visualization and analysis in functional genomics research. *Bioinformatics* 21: 3674-3676.
2. Gotz S, Garcia-Gomez JM, Terol J, Williams TD, Nagaraj SH, et al. (2008) High-throughput functional annotation and data mining with the Blast2GO suite. *Nucleic Acids Research* 36: 3420-3435.
3. Benjamini Y, Yekutieli D (2001) The control of the false discovery rate in multiple testing under dependency. *Annals of Statistics* 29: 1165-1188.
