# Supplementary material for: Local Adaptation at the Transcriptome Level in Brown Trout: Evidence from Early Life History Temperature Genomic Reaction Norms
Source: PubMed Central journal article supplement (PMC3891768; doi:10.1371/journal.pone.0085171), 2014-01-14
Supplement: pone.0085171.s005.pdf [file pone.0085171.s005.pdf]

Table S4. GO-terms identified with enrichment analysis comparing 90 cDNA clones with an interaction effect against the reference set (8588 analysed cDNA clones) with BLAST2GO [1,2]. The following information is given: GO-ID, term, p-value after correcting for the False Discovery rate (FDR) [3], number of cDNA clones representing that GO-term among the 90 cDNA clones with an interaction (Test), and among the 8588 cDNA clones (Reference).

| GO-ID      | Term                                | FDR corrected p-value | Test | Reference |
|------------|-------------------------------------|-----------------------|------|-----------|
| GO:0007160 | cell-matrix adhesion                | 3E-09                 | 9    | 12        |
| GO:0031589 | cell-substrate adhesion             | 3E-09                 | 9    | 12        |
| GO:0019882 | antigen processing and presentation | 2E-05                 | 9    | 48        |
| GO:0007155 | cell adhesion                       | 2E-05                 | 9    | 51        |
| GO:0022610 | biological adhesion                 | 2E-05                 | 9    | 51        |
| GO:0006955 | immune response                     | 3E-04                 | 9    | 72        |
| GO:0002376 | immune system process               | 2E-03                 | 9    | 94        |
| GO:0006886 | intracellular protein transport     | 4E-03                 | 8    | 84        |
| GO:0070727 | cellular macromolecule localization | 5E-03                 | 8    | 88        |
| GO:0034613 | cellular protein localization       | 5E-03                 | 8    | 88        |

#### References

1. Conesa A, Gotz S, Garcia-Gomez JM, Terol J, Talon M, et al. (2005) Blast2GO: a universal tool for annotation, visualization and analysis in functional genomics research. *Bioinformatics* 21: 3674-3676.
2. Gotz S, Garcia-Gomez JM, Terol J, Williams TD, Nagaraj SH, et al. (2008) High-throughput functional annotation and data mining with the Blast2GO suite. *Nucleic Acids Research* 36: 3420-3435.
3. Benjamini Y, Yekutieli D (2001) The control of the false discovery rate in multiple testing under dependency. *Annals of Statistics* 29: 1165-1188.
